# Supplementary material for: Molecularly Imprinted Polymer-Modified Microneedle Sensor for the Detection of Imidacloprid Pesticides in Food Samples
Source: MDPI journal article supplement (doi:10.3390/s22218492), 2022-11-04
Supplement: s1 [file s1]

# Molecularly Imprinted Polymer-Modified Microneedle Sensor for the Detection of Imidacloprid Pesticides in Food Samples

Samuel M. Mugo \*, Weihao Lu and Scott V. Robertson

Department of Physical Sciences, MacEwan University, Edmonton, AB T5J4S2, Canada

\* Correspondence: mugos@macewan.ca

## Supporting Information

**Figure S1.** EIS circuit fittings for the different IDP sensors.

**a)** MIP@CNT/CNC MN sensor

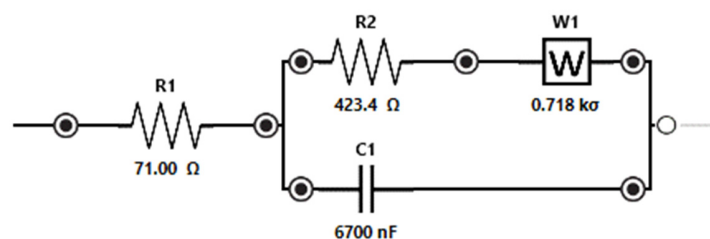

**b)** NIP@CNT/CNC MN sensor

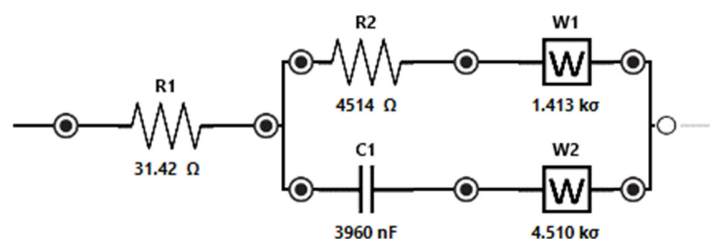

c) IDP-imprinted PANI/CNC@CNT/CNC MN sensor

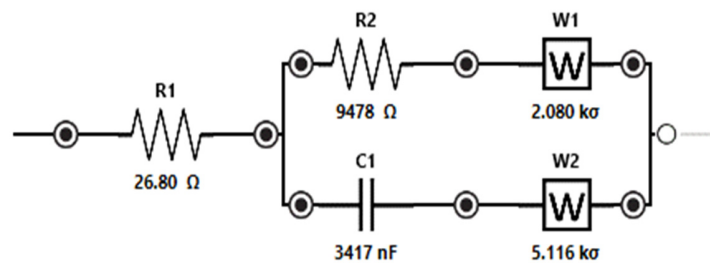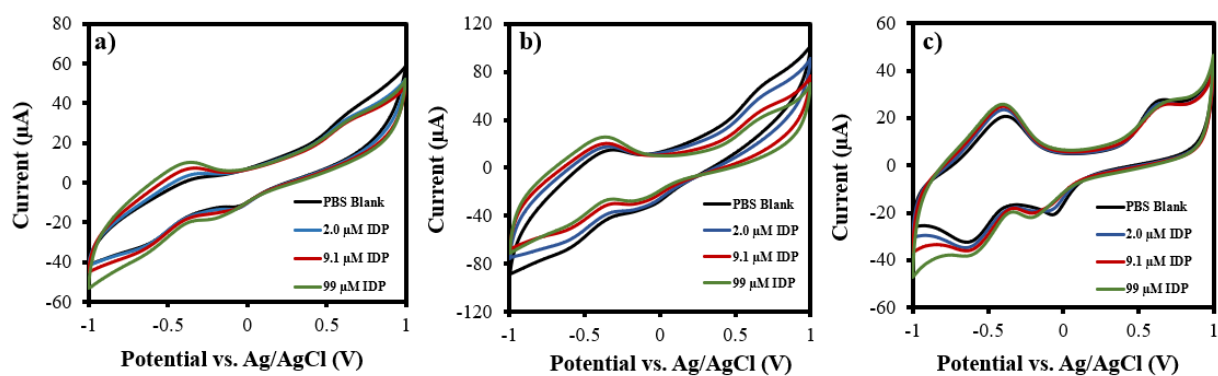

**Figure S2.** Overlaid CVs (0.10 V/s) obtained from the analysis of 0.10 M PBS blank, 2.0, 9.1, and 99  $\mu$ M imidacloprid (IDP) using the **a)** MIP@CNT/CNC; **b)** NIP@CNT/CNC; and **c)** IDP-imprinted PANI/CNC@CNT/CNC MN sensors.

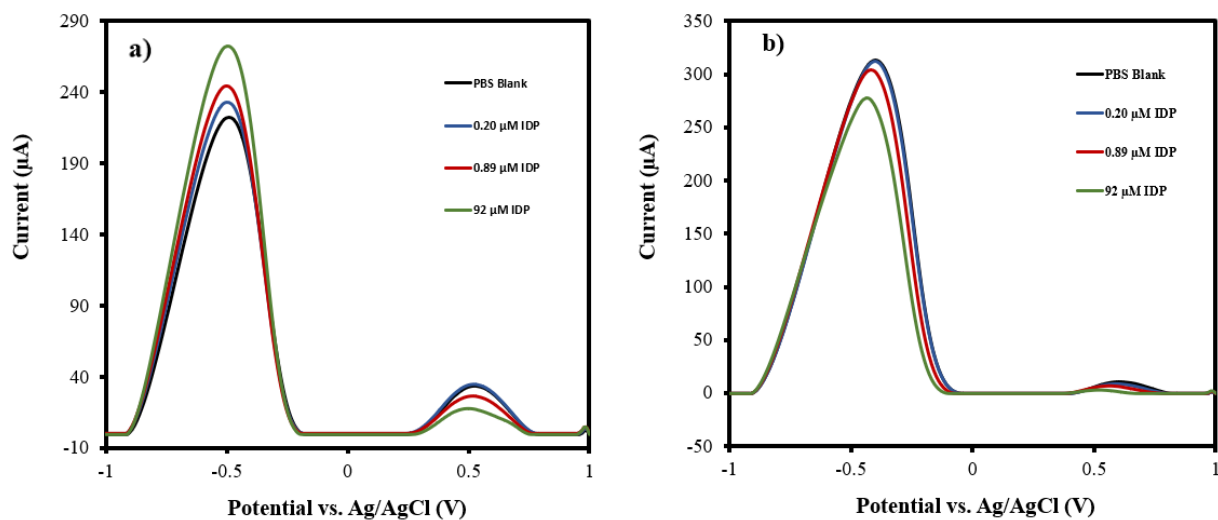

**Figure S3.** Overlaid DPVs (0.10 V/s) obtained from the analysis of 0.10 M PBS blank, 0.20, 0.89, and 92 μM imidacloprid (IDP) using the **a)** MIP@CNT/CNC and **b)** NIP@CNT/CNC MN sensors.

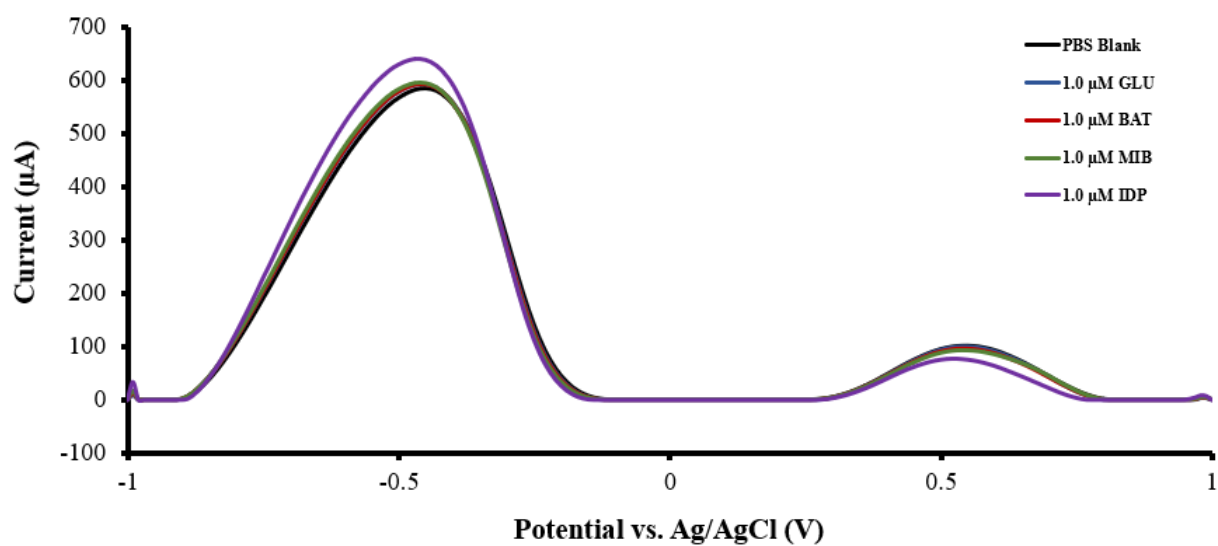

**Figure S4.** Overlaid DPVs (0.10 V/s) obtained from the sequential analysis of 0.10 M PBS blank, 1.0 μM glucose (GLU), 1.0 μM bioallethrin (BAT), 1.0 μM methyl imazamethabenz (MIB), and 1.0 μM imidacloprid (IDP) in 0.10 PBS using the MIP@CNT/CNC MN sensor.

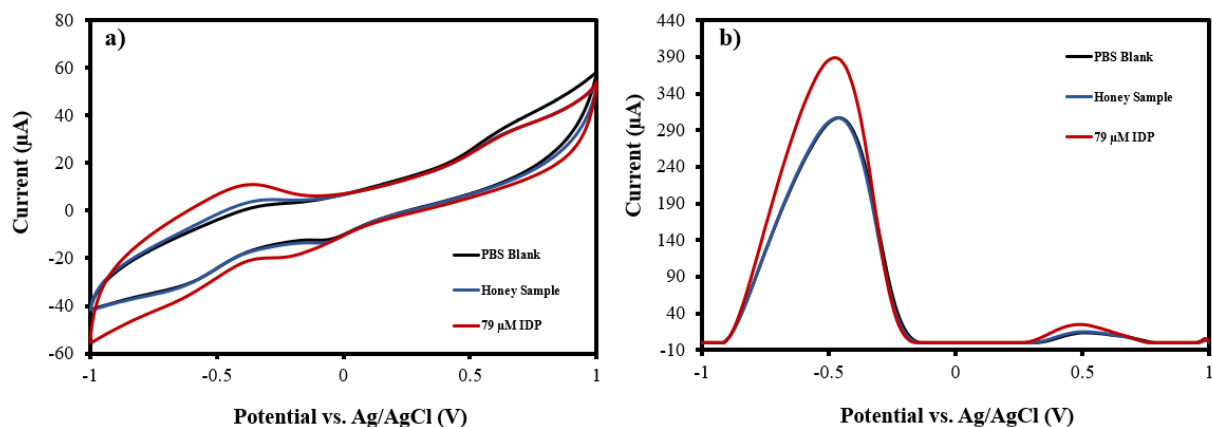

**Figure S5.** Overlaid **a)** CVs (0.10 V/s) and **b)** DPVs (0.10 V/s) obtained from the analysis of 0.10 M PBS blank, honey sample, and 79 μM imidacloprid (IDP) using the MIP@CNT/CNC MN sensor.

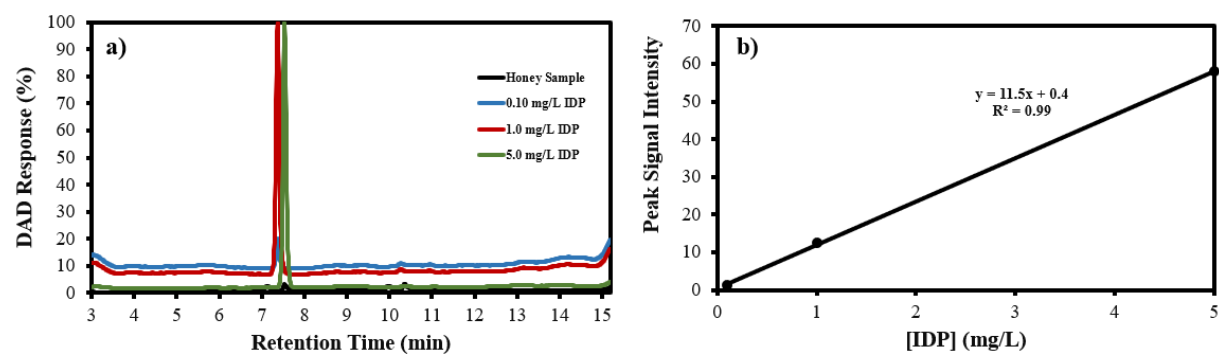

**Figure S6.** **a)** Overlaid LC-MS chromatograms (@ 270.4 nm) obtained from a honey sample, 0.10, 1.0, and 5.0 mg/L imidacloprid (IDP) standards; and **b)** peak signal intensity vs. IDP concentration external calibration curve.
